# Supplementary figures and images for: Tryptophan metabolites relieve intestinal Candida albicans infection by altering the gut microbiota to reduce IL-22 release from group 3 innate lymphoid cells of the colon lamina propria
Source: Royal Society of Chemistry journal article supplement (doi:10.1039/d4fo00432a), 2024-01-01

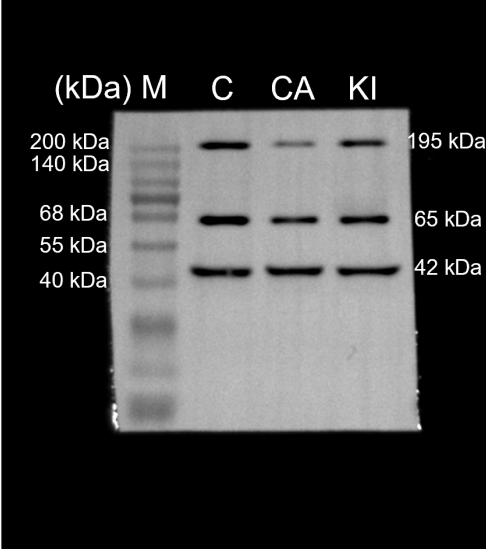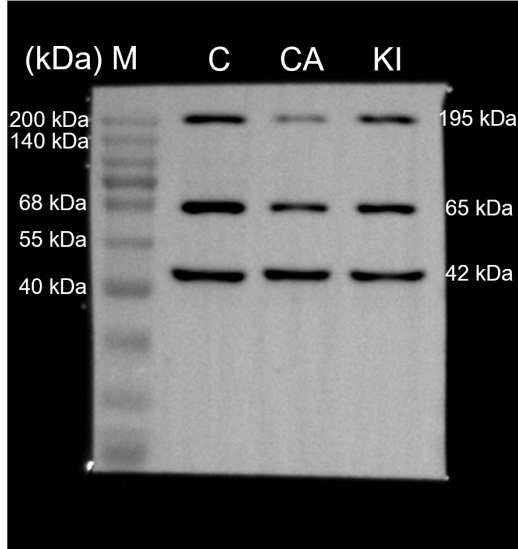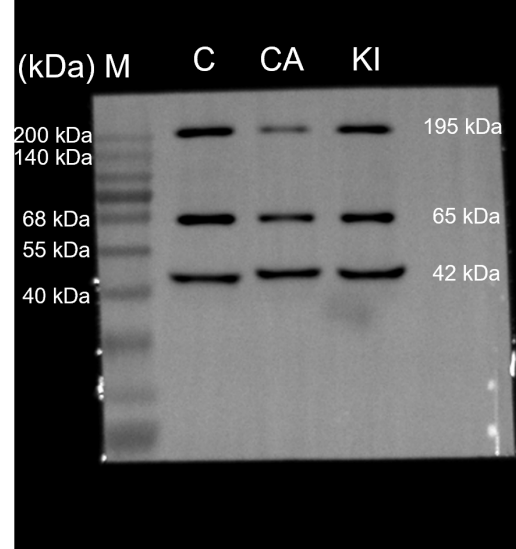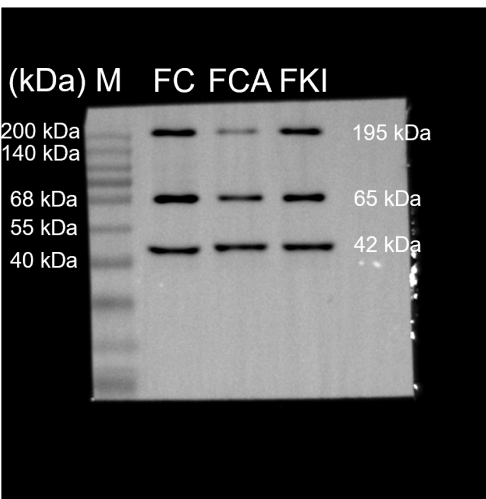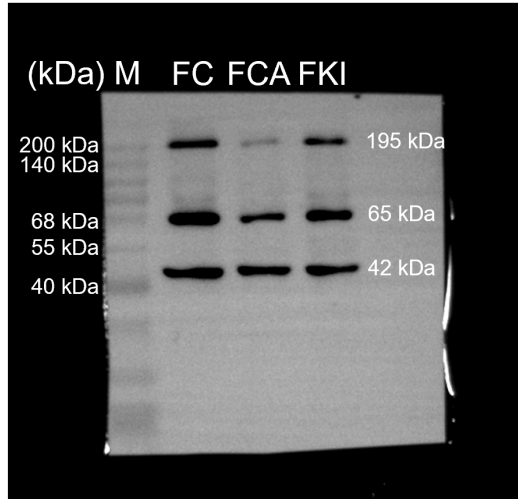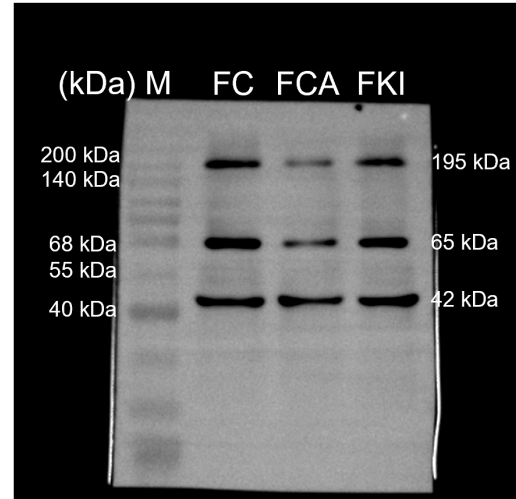

Supplement: d4fo00432a1.zip [file d4fo00432a1.zip]
